# Supplementary material for: Comprehensive Characterization of Human Genome Variation by High Coverage Whole-Genome Sequencing of Forty Four Caucasians
Source: PubMed Central journal article supplement (PMC3618277; doi:10.1371/journal.pone.0059494), 2013-04-05

**Figure S3. SNP allele frequency and size distributions of indels and block substitutions.** **A**, Fraction of nonsynonymous, synonymous, and noncoding SNPs in each minor allele frequency (MAF) class. **B-D**, Size distribution of indels in **B**) coding regions, **C**) introns, and **D**) UTRs, respectively. **E**, Distribution of change in sequence length caused by block substitutions.

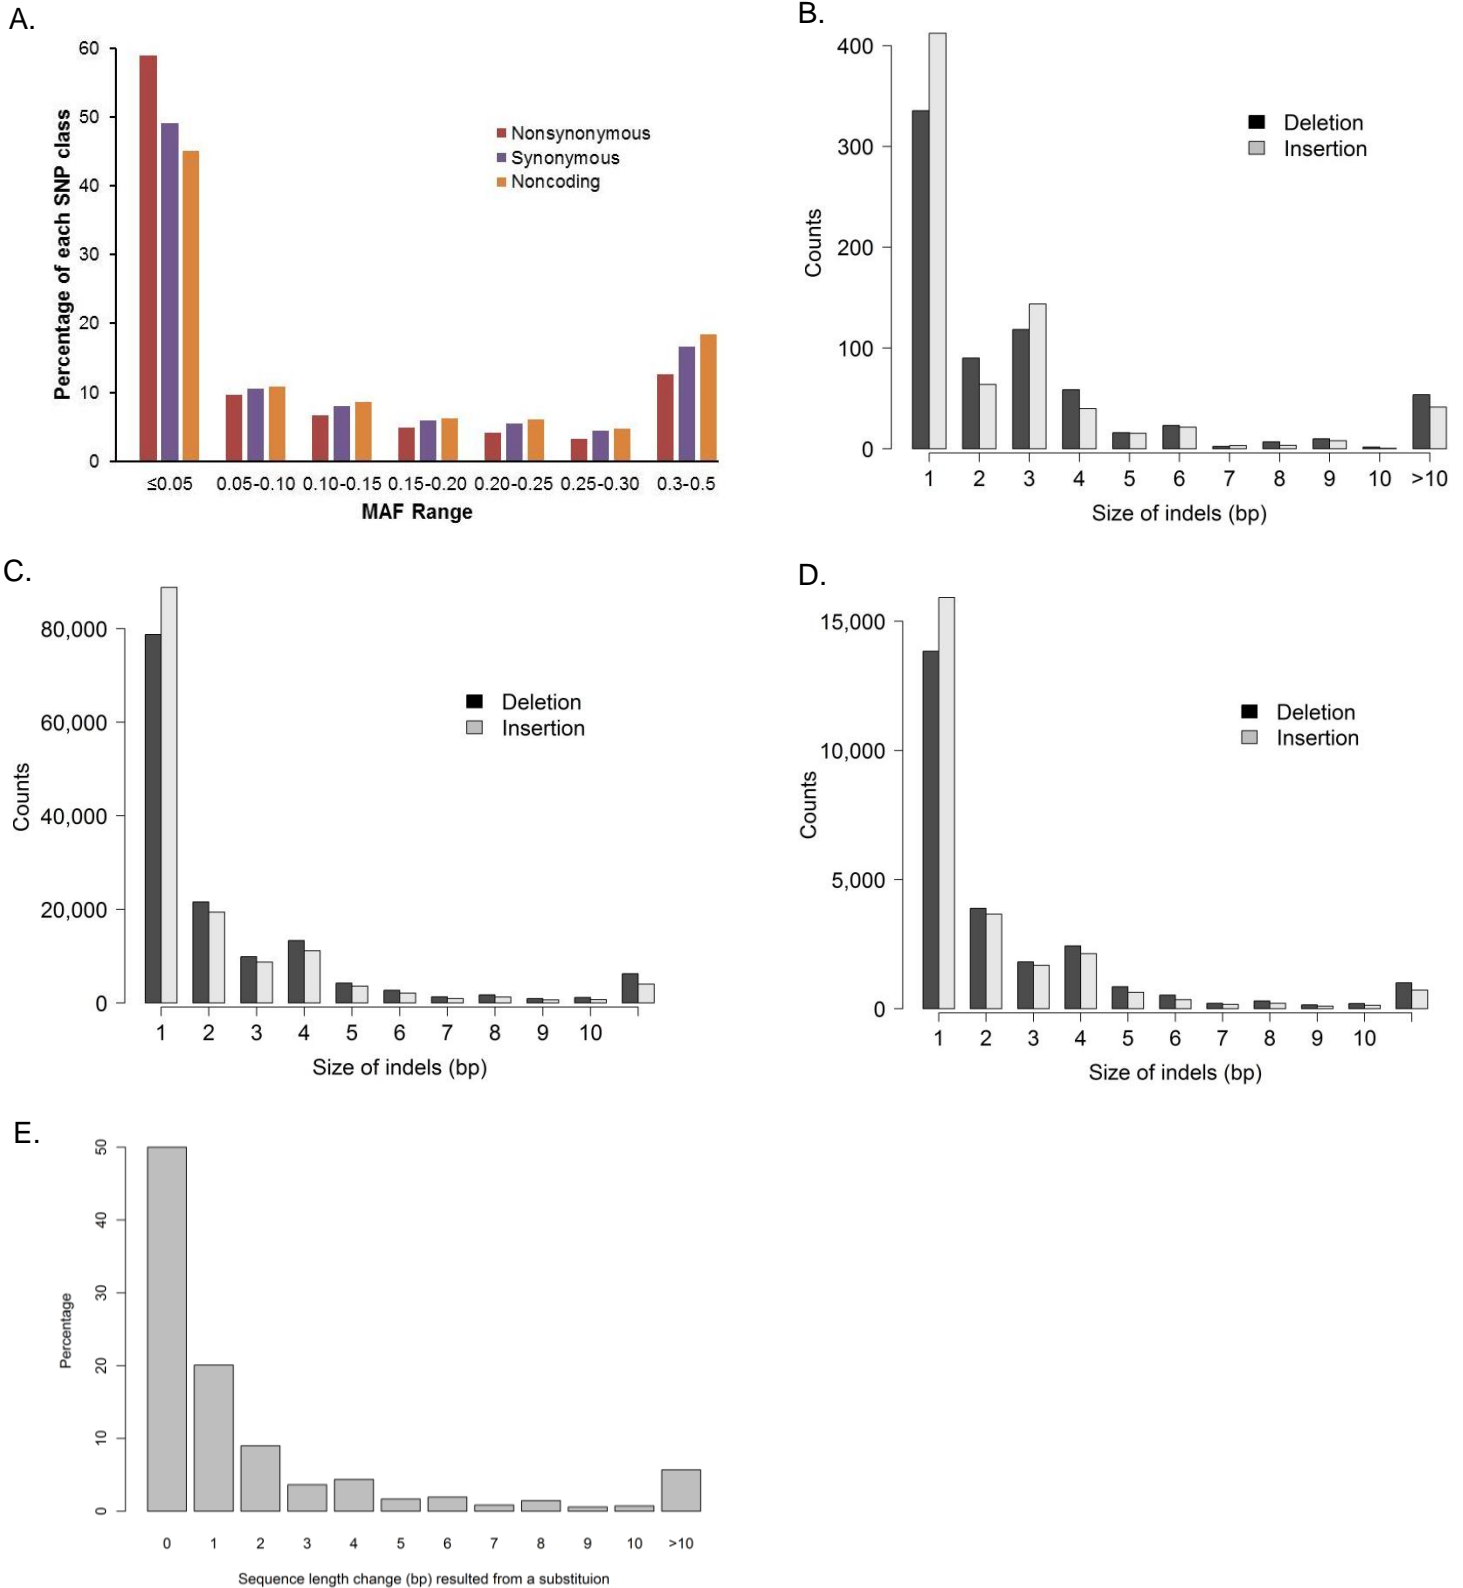

Supplement: pone.0059494.s003.pdf [file pone.0059494.s003.pdf]
