# Supplementary material for: Comprehensive Characterization of Human Genome Variation by High Coverage Whole-Genome Sequencing of Forty Four Caucasians
Source: PubMed Central journal article supplement (PMC3618277; doi:10.1371/journal.pone.0059494), 2013-04-05

**Figure S4. Size distribution of identified CNVs.**

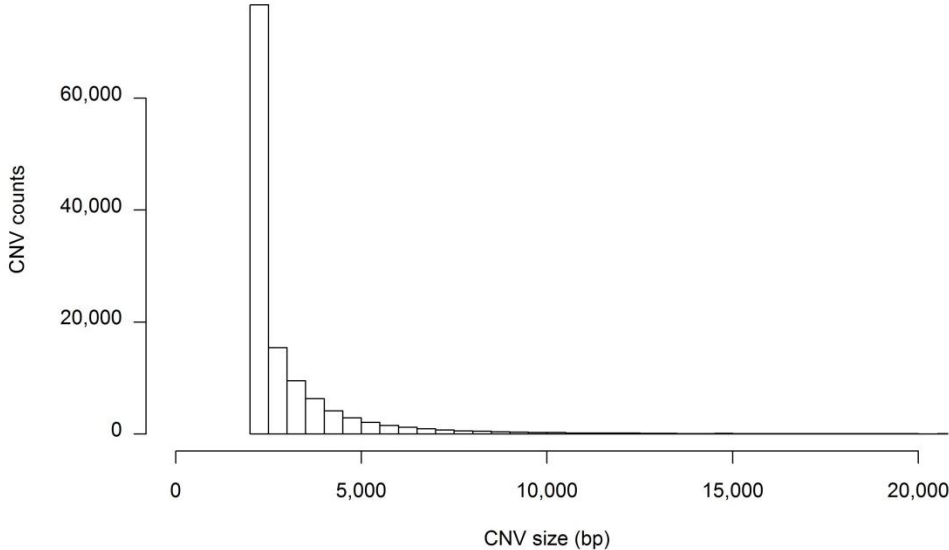

Supplement: pone.0059494.s004.pdf [file pone.0059494.s004.pdf]
