# Supplementary material for: Comprehensive Characterization of Human Genome Variation by High Coverage Whole-Genome Sequencing of Forty Four Caucasians
Source: PubMed Central journal article supplement (PMC3618277; doi:10.1371/journal.pone.0059494), 2013-04-05
Supplement: pone.0059494.s006.pdf [file pone.0059494.s006.pdf]

Table S2. Top 5 regions showing highest proportion of novel SNPs

| Regions      | Positions         | Current Study | dbSNP v131 | 1000 G | Current study vs. dbSNP (Novel rate) | Current Study vs. 1000 G (Novel rate) | 1000 G vs. dbSNP (Novel rate) |
|--------------|-------------------|---------------|------------|--------|--------------------------------------|---------------------------------------|-------------------------------|
| Xq11.1       | 61800001-62100000 | 1814          | 9123       | 3625   | 308 (83%)                            | 245 (86%)                             | 206 (91%)                     |
| Xq11.1       | 61500001-61800000 | 955           | 10289      | 600    | 235 (75%)                            | 28 (97%)                              | 18 (87%)                      |
| 16p11.1      | 35100001-35400000 | 1104          | 7931       | 2146   | 261 (76%)                            | 162 (85%)                             | 697 (84%)                     |
| 3p11.1       | 90300001-90600000 | 1126          | 9126       | 2427   | 229 (80%)                            | 223 (80%)                             | 714 (87%)                     |
| 7q11.1-q11.2 | 61500001-61800000 | 915           | 9761       | 1540   | 159 (83%)                            | 138 (85%)                             | 1028 (87%)                    |

Numbers shown are total numbers of SNPs identified in the selected 1Mb regions from each data set, and numbers of SNPs shared between two data sets. 1000 G: data from the 1000 Genome Project Phase 1 data released on 5/21/2011.
