# Supplementary material for: Comprehensive Characterization of Human Genome Variation by High Coverage Whole-Genome Sequencing of Forty Four Caucasians
Source: PubMed Central journal article supplement (PMC3618277; doi:10.1371/journal.pone.0059494), 2013-04-05
Supplement: pone.0059494.s007.pdf [file pone.0059494.s007.pdf]

Table S3. Fifteen loss-of-function variants that were presented as homozygous form in all 44 genomes

| <b>Position</b>           | <b>varType</b> | <b>dbSNP</b> | <b>Ref</b> | <b>Calls</b> | <b>Impact</b> | <b>Gene</b> |
|---------------------------|----------------|--------------|------------|--------------|---------------|-------------|
| chr1:156565050-156565050  | ins            | rs10637036   | -          | CA           | Frameshift    | GPATCH4     |
| chr11:46342261-46342261   | ins            | rs71038900   | -          | G            | Frameshift    | CREB3L1     |
| chr11:125452303-125452303 | ins            | rs55912941   | -          | C            | Frameshift    | EI24        |
| chr16:138773-138773       | ins            | rs57321480   | -          | G            | Frameshift    | C16orf35    |
| chr17:61660894-61660895   | del            | rs67652163   | G          | -            | Frameshift    | DCAF7       |
| chr19:36214633-36214633   | ins            | rs11373774   | -          | G            | Frameshift    | MLL4        |
| chr19:58718361-58718361   | ins            | rs59557917   | -          | G            | Frameshift    | ZNF274      |
| chr22:19189004-19189004   | ins            | rs11386977   | -          | C            | Frameshift    | CLTCL1      |

“Ref” represents the sequences at the corresponding positions in the NCBI human reference genome (build 37.1, GRCh37/hg19), and “Calls” represents sequences called in our samples.
