# Supplementary material for: Comprehensive Characterization of Human Genome Variation by High Coverage Whole-Genome Sequencing of Forty Four Caucasians
Source: PubMed Central journal article supplement (PMC3618277; doi:10.1371/journal.pone.0059494), 2013-04-05
Supplement: pone.0059494.s008.pdf [file pone.0059494.s008.pdf]

Table S4. Heterozygous autosomal dominant and homozygous autosomal recessive variants identified in the 44 genomes

| Chr.                                                   | Position  | AA change | Gene      | OMIM accession | Phenotype                                                                | # of subjects | MAF   |
|--------------------------------------------------------|-----------|-----------|-----------|----------------|--------------------------------------------------------------------------|---------------|-------|
| <b><i>Heterozygous Autosomal Dominant Variants</i></b> |           |           |           |                |                                                                          |               |       |
| 1                                                      | 12064892  | R468H     | MFN2      | 608507.0015    | Charcot-Marie-Tooth disease-2A2                                          | 2             | NA    |
| 1                                                      | 147380823 | I247M     | GJA8      | 600897.0003    | zonular pulverulent cataract                                             | 1             | NA    |
| 2                                                      | 71058878  | W264R     | CD207     | 604862.0001    | Birbeck granule deficiency                                               | 2             | NA    |
| 2                                                      | 216235046 | Q1974R    | FN1       | 135600.0002    | glomerulopathy with fibronectin deposits 2                               | 1             | NA    |
| 4                                                      | 88533540  | R68W      | DSPP      | 125485.0006    | type II dentinogenesis imperfecta                                        | 2             | NA    |
| 7                                                      | 19156382  | S188L     | TWIST1    | 601622.0014    | craniosynostosis type 1                                                  | 1             | NA    |
| 10                                                     | 31810782  | Q840P     | ZEB1      | 189909.0004    | Fuchs endothelial corneal dystrophy-6                                    | 1             | NA    |
| 10                                                     | 88446830  | D117N     | LDB3      | 605906.0007    | dilated cardiomyopathy with left ventricular noncompaction               | 1             | NA    |
| 12                                                     | 57431402  | G662E     | MYO1A     | 601478.0005    | autosomal dominant nonsyndromic deafness-48                              | 7             | 0.025 |
| 12                                                     | 122295335 | A33T      | HPD       | 609695.0005    | hawkinsinuria                                                            | 11            | 0.125 |
| 15                                                     | 48779352  | R1170H    | FBN1      | 134797.0032    | subdiagnostic variant of Marfan syndrome                                 | 1             | NA    |
| 17                                                     | 16852187  | C104R     | TNFRSF13B | 604907.0001    | common variable immunodeficiency-2 / immunoglobulin A (IgA) deficiency-2 | 2             | 0.014 |
| 17                                                     | 72745313  | L110V     | SLC9A3R1  | 604990.0001    | hypophosphatemic nephrolithiasis/osteoporosis-2                          | 3             | 0.034 |
| 21                                                     | 47552201  | P932L     | COL6A2    | 120240.0010    | Bethlem myopathy                                                         | 1             | NA    |
| <b><i>Homozygous Autosomal Recessive Variants</i></b>  |           |           |           |                |                                                                          |               |       |
| 1                                                      | 158624528 | A970D     | SPTA1     | 182860.0009    | hereditary spherocytosis-3                                               | 1             | 0.042 |
| 10                                                     | 13340236  | P29S      | PHYH      | 602026.0006    | adult Refsum disease                                                     | 1             | 0.150 |
| 16                                                     | 48258198  | G180R     | ABCC11    | 607040.0001    | wet/dry ear wax                                                          | 1             | 0.125 |
| 20                                                     | 43255220  | K80R      | ADA       | 608958.0001    | severe combined immunodeficiency, due to adenosine deaminase deficiency  | 1             | 0.033 |

“AA change”: amino acid changes by the variants. “MAF”: minor allele frequency reported in dbSNP.
