# Supplementary material for: Comprehensive Characterization of Human Genome Variation by High Coverage Whole-Genome Sequencing of Forty Four Caucasians
Source: PubMed Central journal article supplement (PMC3618277; doi:10.1371/journal.pone.0059494), 2013-04-05
Supplement: pone.0059494.s009.pdf [file pone.0059494.s009.pdf]

Table S5. Summary of variants identified on mitochondrial and Y chromosome

| <b>Variant Type</b>    | <b>No. of SNPs<br/>(% novel)</b> | <b>No. of Indels and block substitutions<br/>(% of novel)</b> |
|------------------------|----------------------------------|---------------------------------------------------------------|
| Mitochondria           | 285 (53.7%)                      | 21 (90.5%)                                                    |
| Noncoding              | 90 (54.4%)                       | 20 (90.0%)                                                    |
| Coding                 | 195 (53.3%)                      | 1 (100%)                                                      |
| Y Chromosome           | 8,673 (54.3%)                    | 2,348 (65.2%)                                                 |
| Intergenic             | 7,915 (54.0%)                    | 2,170 (63.8%)                                                 |
| Intragenic             | 758 (57.5%)                      | 178 (82.3%)                                                   |
| Intron                 | 578 (62.6%)                      | 144 (84.0%)                                                   |
| UTR                    | 139 (43.9%)                      | 28 (82.1%)                                                    |
| Splicing acceptor site | 1 (0%)                           | 1 (100%)                                                      |
| Splicing donor site    | 0                                | 0                                                             |
| Coding domain          | 40 (32.5%)                       | 5 (40.0%)                                                     |
